# Supplementary material
Source: PubMed Central journal article supplement (PMC3030210)
Supplement: mmc1.pdf [file mmc1.pdf]

## **Meconium Impairs Pulmonary Surfactant by a Combined Action of Cholesterol and Bile Acids**

Elena Lopez-Rodriguez, Mercedes Echaide, Antonio Cruz, H. William Taeusch, and Jesus Perez-Gil

**Supplementary Table 1:****Effect of meconium on the surface behavior of pulmonary surfactant as assessed in a captive bubble surfactometer, under quasi-static or dynamic conditions****Q-stat 4**

| Sample               | $\gamma$ min (mN/m) | $\gamma$ max (mN/m) | relative Area ( $\gamma$ min) |
|----------------------|---------------------|---------------------|-------------------------------|
| NS                   | 1.7 ± 0.3           | 28.7 ± 1.5          | 0.79 ± 0.05                   |
| NS+Meconium          | 11.1 ± 9.5          | 25.9 ± 0.4          | 0.57 ± 0.18                   |
| NS+Chol/TA           | 5.1 ± 4.8           | 26.2 ± 0.9          | 0.55 ± 0.22                   |
| NS+Chol/M $\beta$ CD | 5.0 ± 3.2           | 25.4 ± 0.7          | 0.58 ± 0.13                   |

**Dyn 20**

|                      |           |            |             |
|----------------------|-----------|------------|-------------|
| NS                   | 1.7 ± 0.3 | 32.5 ± 1.4 | 0.82 ± 0.02 |
| NS+Meconium          | 1.4 ± 0.3 | 32.1 ± 0.8 | 0.82 ± 0.03 |
| NS+Chol/TA           | 1.2 ± 0.8 | 31.2 ± 2.4 | 0.80 ± 0.06 |
| NS+Chol/M $\beta$ CD | 1.7 ± 0.4 | 31.2 ± 2.1 | 0.82 ± 0.04 |

NS: native surfactant; Q-stat 4: parameters obtained at the 4<sup>th</sup> quasi-static compression-expansion cycle;Dyn 20: parameters obtained at the 20<sup>th</sup> dynamic compression-expansion cycle.

Data are mean ± s.d. (n=6)

**Supplementary Table 2:**

**Compositional analysis of meconium**

| <b>Component</b> | <b>Mass (mg/mg meconium)</b> |
|------------------|------------------------------|
| Proteins         | 0.015                        |
| Phospholipids    | 0.013                        |
| Cholesterol      | 0.040                        |
| Bile Acids       | 0.005                        |

**Supplementary Table 3:**  
**Effect of exposure to meconium or to a mixture of bile acids and cholesterol on the thermotropic transition of native surfactant membranes, as evaluated by DSC**

| <b>Sample</b> | <b>T<sub>m</sub> (°C)</b> | <b>Enthalpy (kcal/mol)</b> | <b>T<sub>1/2</sub> (°C)</b> |
|---------------|---------------------------|----------------------------|-----------------------------|
| NS            | 35.7 ± 2.4                | 2.5 ± 0.3                  | 9.9 ± 0.3                   |
| NS + Meconium | 35.4 ± 0.4                | 1.5 ± 0.4                  | 9.5 ± 1.5                   |
| NS + Chol/TA  | 35.7 ± 2.1                | 1.4 ± 0.3                  | 9.3 ± 1.9                   |

Data are mean ± s.d. (n=3)
